# Supplementary material for: Mutagenesis of PhaR, a Regulator Gene of Polyhydroxyalkanoate Biosynthesis of Xanthomonas oryzae pv. oryzae Caused Pleiotropic Phenotype Changes
Source: Front Microbiol. 2018 Dec 17;9:3046. doi: 10.3389/fmicb.2018.03046 (PMC6304360; doi:10.3389/fmicb.2018.03046)
Supplement: Supplementary file 3 [file Table_3.XLSX]

## Sheet: Sheet1
Table S3. Sequence designations used for phylogenetic tree analysis
Sequence designations	Organism name	strain	host	Gene locu tag	Protein ID
XooPXO99A	Xanthomonas oryzae pv. oryzae	PXO99A	rice	PXO_00407	ACD58561.1
XooPXO61	Xanthomonas oryzae pv. oryzae	PXO61	rice	B9W05_08415	AWK21275.1
XooMAFF311018	Xanthomonas oryzae pv. oryzae	MAFF311018	rice	XOO2574	BAE69329.1
XooKACC10331A	Xanthomonas oryzae pv. oryzae	KACC10331	rice	XOO2729	AAW75983.1
XooPXO83	Xanthomonas oryzae pv. oryzae	PXO83	rice	APZ20_12370	ALZ74117.1
XooPXO71	Xanthomonas oryzae pv. oryzae	PXO71	rice	ATY42_13115	AOS04630.1
XooPXO145	Xanthomonas oryzae pv. oryzae	PXO145	rice	ATY43_09385	AOS08689.1
XooPXO282	Xanthomonas oryzae pv. oryzae	PXO282	rice	ATY46_13455	AOS21259.1
XooPXO602	Xanthomonas oryzae pv. oryzae	PXO602	rice	ATY49_13205	AOS33745.1
XooPXO563	Xanthomonas oryzae pv. oryzae	PXO563	rice	ATY48_13190	AOS29605.1
XooPXO524	Xanthomonas oryzae pv. oryzae	PXO524	rice	ATY47_13395	AOS25425.1
XooPXO86	Xanthomonas oryzae pv. oryzae	PXO86	rice	AZ54_10500	AJQ82980.1
XooPXO236	Xanthomonas oryzae pv. oryzae	PXO236	rice	ATY45_09590	AOS17065.1
XooPXO211	Xanthomonas oryzae pv. oryzae	PXO211	rice	ATY44_09790	AOS10547.1
XooAXO1947	Xanthomonas oryzae pv. oryzae	AXO1947	rice	AXO1947_08925	ALS94617.1
XooMAI145	Xanthomonas oryzae pv. oryzae	MAI145	rice	BVV13_12605	AUJ16601.1
XooMAI134	Xanthomonas oryzae pv. oryzae	MAI134	rice	BVV20_12910	AUJ12904.1
XooMAI129	Xanthomonas oryzae pv. oryzae	MAI129	rice	BVV09_12605	AUJ09195.1
XooMAI106	Xanthomonas oryzae pv. oryzae	MAI106	rice	BVV19_12630	AUJ05523.1
XooMAI99	Xanthomonas oryzae pv. oryzae	MAI99	rice	BVV10_12610	AUJ01850.1
XooMAI95	Xanthomonas oryzae pv. oryzae	MAI95	rice	BVV18_12610	AUI98175.1
XooMAI73	Xanthomonas oryzae pv. oryzae	MAI73	rice	BVV17_12605	AUI94505.1
XooMAI68	Xanthomonas oryzae pv. oryzae	MAI68	rice	BVV16_12600	AUI90832.1
XocCFBP2286	Xanthomonas oryzae pv. oryzicola	CFBP2286	rice	ACU11_09390	AKO19638.1
XocCFBP7342	Xanthomonas oryzae pv. oryzicola	CFBP7342	rice	BE73_09955	AJQ87371.1
XocCFBP7341	Xanthomonas oryzae pv. oryzicola	CFBP7341	rice	ACU17_12280	AKO08708.1
XocCFBP7331	Xanthomonas oryzae pv. oryzicola	CFBP7331	rice	ACU16_12465	AKO04825.1
XocBLS256	Xanthomonas oryzae pv. oryzicola	BLS256	rice	XOC_2098	AEQ96244.1
XocYM15	Xanthomonas oryzae pv. oryzicola	YM15	rice	FE36_08350	AKK63850.1
XocRS105	Xanthomonas oryzae pv. oryzicola	RS105	rice	ACU12_11715	AKO16295.1
XocL8	Xanthomonas oryzae pv. oryzicola	L8	rice	ACU14_11675	AKO12550.1
XocBXOR1	Xanthomonas oryzae pv. oryzicola	BXOR1	rice	ACU15_11465	AKO01025.1
XocBLS279	Xanthomonas oryzae pv. oryzicola	BLS279	rice	ACU10_11675	AKN97336.1
XocB8-12	Xanthomonas oryzae pv. oryzicola	B8-12	rice	ACU13_11730	AKN93605.1
XppCFBP6982	Xanthomonas phaseoli pv. phaseoli	CFBP6982	bean	XppCFBP6982P_01250	ATS32708.1
XadLMG695	Xanthomonas axonopodis pv. dieffenbachiae	LMG695	Anthurium	no	no
Xp91-118	Xanthomonas perforans	91-118	pepper/tomato	XPE_00505	AQS74993.1
XeLMG930	Xanthomonas euvesicatoria	LMG930	Solanaceae	BJD11_09900	APO90315.1
Xcv85-10	Xanthomonas campestris pv. vesicatoria	85--10	pepper	BHE83_05655	AOY66106.1
XacF1	Xanthomonas axonopodis pv. citrumelo	F1	citrus	XACM_2407	AEO42668.1
XcviCFBP7111	Xanthomonas citri pv. vignicola	CFBP7111	cowpea	XcvCFBP7111P_11280	"ASK92005.1
Xca1566	Xanthomonas citri pv. aurantifolii	1566	citrus	AC028_19540	AMV08758.1
XcpCFBP6988R	Xanthomonas citri pv. phaseoli var. fuscans	CFBP6988R	bean	XcfCFBP6988P_14745	ATS39222.1
Xcf4834-R	Xanthomonas citri pv. fuscans	4834-R	bean	XFF4834R_chr24130	CDF61931.1
