# Supplementary material for: Mutagenesis of PhaR, a Regulator Gene of Polyhydroxyalkanoate Biosynthesis of Xanthomonas oryzae pv. oryzae Caused Pleiotropic Phenotype Changes
Source: Front Microbiol. 2018 Dec 17;9:3046. doi: 10.3389/fmicb.2018.03046 (PMC6304360; doi:10.3389/fmicb.2018.03046)
Supplement: Supplementary file 4 [file Table_4.XLSX]

## Sheet: Sheet1
Table S4
Supplementary sequences for phylogenetic analysis
>XooPXO99A
TTGGCTGTTGCAAGCGCTGCTGCGGTGCGCCATCCTGCGCGCACTATCAGTGTGGGTGAACGTTCCATGGCCGGACTTCGCATCATCAAGAAGTATCCCAATCGCCGTCTCTACGACACGGAAATCTCCAGCTATATCACCATCGAAGATGTGCGCCAATTGATCATCGATGGCGAAGAATTCGAGGTACGCGATGCCAAGAGTGGCGAAGACCTGAGCCGCGCGGTGCTGCTGCAAATCATCGCCGACCGCGAACAGGACGGCGAGCCGATGCTCTCCACCCAGCTGCTGAGCCAGATCATCCGGTTCTATGGCGATTCGCTGCAGGGCTTCATGGGCAACTACCTGGAGCGCAGCATGCAGGTGTTCCTGGATCAGCAGCAGCAGTTCCGCCAGCAG…
>XooPXO602
TTGGCTGTTGCAAGCGCTGCTGCGGTGCGCCATCCTGCGCGCACTATCAGTGTGGGTGAACGTTCCATGGCCGGACTTCGCATCATCAAGAAGTATCCCAATCGCCGTCTCTACGACACGGAAATCTCCAGCTATATCACCATCGAAGATGTGCGCCAATTGATCATCGATGGCGAAGAATTCGAGGTACGCGATGCCAAGAGTGGCGAAGACCTGAGCCGCGCGGTGCTGCTGCAAATCATCGCCGACCGCGAACAGGACGGCGAGCCGATGCTCTCCACCCAGCTGCTGAGCCAGATCATCCGGTTCTATGGCGATTCGCTGCAGGGCTTCATGGGCAACTACCTGGAGCGCAGCATGCAGGTGTTCCTGGATCAGCAGCAGCAGTTCCGCCAGCAG…
> XooPXO563
TTGGCTGTTGCAAGCGCTGCTGCGGTGCGCCATCCTGCGCGCACTATCAGTGTGGGTGAACGTTCCATGGCCGGACTTCGCATCATCAAGAAGTATCCCAATCGCCGTCTCTACGACACGGAAATCTCCAGCTATATCACCATCGAAGATGTGCGCCAATTGATCATCGATGGCGAAGAATTCGAGGTACGCGATGCCAAGAGTGGCGAAGACCTGAGCCGCGCGGTGCTGCTGCAAATCATCGCCGACCGCGAACAGGACGGCGAGCCGATGCTCTCCACCCAGCTGCTGAGCCAGATCATCCGGTTCTATGGCGATTCGCTGCAGGGCTTCATGGGCAACTACCTGGAGCGCAGCATGCAGGTGTTCCTGGATCAGCAGCAGCAGTTCCGCCAGCAG…
>XooPXO524
TTGGCTGTTGCAAGCGCTGCTGCGGTGCGCCATCCTGCGCGCACTATCAGTGTGGGTGAACGTTCCATGGCCGGACTTCGCATCATCAAGAAGTATCCCAATCGCCGTCTCTACGACACGGAAATCTCCAGCTATATCACCATCGAAGATGTGCGCCAATTGATCATCGATGGCGAAGAATTCGAGGTACGCGATGCCAAGAGTGGCGAAGACCTGAGCCGCGCGGTGCTGCTGCAAATCATCGCCGACCGCGAACAGGACGGCGAGCCGATGCTCTCCACCCAGCTGCTGAGCCAGATCATCCGGTTCTATGGCGATTCGCTGCAGGGCTTCATGGGCAACTACCTGGAGCGCAGCATGCAGGTGTTCCTGGATCAGCAGCAGCAGTTCCGCCAGCAG…
>XooPXO282
TTGGCTGTTGCAAGCGCTGCTGCGGTGCGCCATCCTGCGCGCACTATCAGTGTGGGTGAACGTTCCATGGCCGGACTTCGCATCATCAAGAAGTATCCCAATCGCCGTCTCTACGACACGGAAATCTCCAGCTATATCACCATCGAAGATGTGCGCCAATTGATCATCGATGGCGAAGAATTCGAGGTACGCGATGCCAAGAGTGGCGAAGACCTGAGCCGCGCGGTGCTGCTGCAAATCATCGCCGACCGCGAACAGGACGGCGAGCCGATGCTCTCCACCCAGCTGCTGAGCCAGATCATCCGGTTCTATGGCGATTCGCTGCAGGGCTTCATGGGCAACTACCTGGAGCGCAGCATGCAGGTGTTCCTGGATCAGCAGCAGCAGTTCCGCCAGCAG…
>XooPXO236
TTGGCTGTTGCAAGCGCTGCTGCGGTGCGCCATCCTGCGCGCACTATCAGTGTGGGTGAACGTTCCATGGCCGGACTTCGCATCATCAAGAAGTATCCCAATCGCCGTCTCTACGACACGGAAATCTCCAGCTATATCACCATCGAAGATGTGCGCCAATTGATCATCGATGGCGAAGAATTCGAGGTACGCGATGCCAAGAGTGGCGAAGACCTGAGCCGCGCGGTGCTGCTGCAAATCATCGCCGACCGCGAACAGGACGGCGAGCCGATGCTCTCCACCCAGCTGCTGAGCCAGATCATCCGGTTCTATGGCGATTCGCTGCAGGGCTTCATGGGCAACTACCTGGAGCGCAGCATGCAGGTGTTCCTGGATCAGCAGCAGCAGTTCCGCCAGCAG…
>XooPXO211
TTGGCTGTTGCAAGCGCTGCTGCGGTGCGCCATCCTGCGCGCACTATCAGTGTGGGTGAACGTTCCATGGCCGGACTTCGCATCATCAAGAAGTATCCCAATCGCCGTCTCTACGACACGGAAATCTCCAGCTATATCACCATCGAAGATGTGCGCCAATTGATCATCGATGGCGAAGAATTCGAGGTACGCGATGCCAAGAGTGGCGAAGACCTGAGCCGCGCGGTGCTGCTGCAAATCATCGCCGACCGCGAACAGGACGGCGAGCCGATGCTCTCCACCCAGCTGCTGAGCCAGATCATCCGGTTCTATGGCGATTCGCTGCAGGGCTTCATGGGCAACTACCTGGAGCGCAGCATGCAGGTGTTCCTGGATCAGCAGCAGCAGTTCCGCCAGCAG…
>XooPXO145
TTGGCTGTTGCAAGCGCTGCTGCGGTGCGCCATCCTGCGCGCACTATCAGTGTGGGTGAACGTTCCATGGCCGGACTTCGCATCATCAAGAAGTATCCCAATCGCCGTCTCTACGACACGGAAATCTCCAGCTATATCACCATCGAAGATGTGCGCCAATTGATCATCGATGGCGAAGAATTCGAGGTACGCGATGCCAAGAGTGGCGAAGACCTGAGCCGCGCGGTGCTGCTGCAAATCATCGCCGACCGCGAACAGGACGGCGAGCCGATGCTCTCCACCCAGCTGCTGAGCCAGATCATCCGGTTCTATGGCGATTCGCTGCAGGGCTTCATGGGCAACTACCTGGAGCGCAGCATGCAGGTGTTCCTGGATCAGCAGCAGCAGTTCCGCCAGCAG…
>XooPXO71
TTGGCTGTTGCAAGCGCTGCTGCGGTGCGCCATCCTGCGCGCACTATCAGTGTGGGTGAACGTTCCATGGCCGGACTTCGCATCATCAAGAAGTATCCCAATCGCCGTCTCTACGACACGGAAATCTCCAGCTATATCACCATCGAAGATGTGCGCCAATTGATCATCGATGGCGAAGAATTCGAGGTACGCGATGCCAAGAGTGGCGAAGACCTGAGCCGCGCGGTGCTGCTGCAAATCATCGCCGACCGCGAACAGGACGGCGAGCCGATGCTCTCCACCCAGCTGCTGAGCCAGATCATCCGGTTCTATGGCGATTCGCTGCAGGGCTTCATGGGCAACTACCTGGAGCGCAGCATGCAGGTGTTCCTGGATCAGCAGCAGCAGTTCCGCCAGCAG…
>XooPXO83
TTGGCTGTTGCAAGCGCTGCTGCGGTGCGCCATCCTGCGCGCACTATCAGTGTGGGTGAACGTTCCATGGCCGGACTTCGCATCATCAAGAAGTATCCCAATCGCCGTCTCTACGACACGGAAATCTCCAGCTATATCACCATCGAAGATGTGCGCCAATTGATCATCGATGGCGAAGAATTCGAGGTACGCGATGCCAAGAGTGGCGAAGACCTGAGCCGCGCGGTGCTGCTGCAAATCATCGCCGACCGCGAACAGGACGGCGAGCCGATGCTCTCCACCCAGCTGCTGAGCCAGATCATCCGGTTCTATGGCGATTCGCTGCAGGGCTTCATGGGCAACTACCTGGAGCGCAGCATGCAGGTGTTCCTGGATCAGCAGCAGCAGTTCCGCCAGCAG…
>XooPXO86
TTGGCTGTTGCAAGCGCTGCTGCGGTGCGCCATCCTGCGCGCACTATCAGTGTGGGTGAACGTTCCATGGCCGGACTTCGCATCATCAAGAAGTATCCCAATCGCCGTCTCTACGACACGGAAATCTCCAGCTATATCACCATCGAAGATGTGCGCCAATTGATCATCGATGGCGAAGAATTCGAGGTACGCGATGCCAAGAGTGGCGAAGACCTGAGCCGCGCGGTGCTGCTGCAAATCATCGCCGACCGCGAACAGGACGGCGAGCCGATGCTCTCCACCCAGCTGCTGAGCCAGATCATCCGGTTCTATGGCGATTCGCTGCAGGGCTTCATGGGCAACTACCTGGAGCGCAGCATGCAGGTGTTCCTGGATCAGCAGCAGCAGTTCCGCCAGCAG…
>XooMAFF 311018
TTGGCTGTTGCAAGCGCTGCTGCGGTGCGCCATCCTGCGCGCACTATCAGTGTGGGTGAACGTTCCATGGCCGGACTTCGCATCATCAAGAAGTATCCCAATCGCCGTCTCTACGACACGGAAATCTCCAGCTATATCACCATCGAAGATGTGCGCCAATTGATCATCGATGGCGAAGAATTCGAGGTACGCGATGCCAAGAGTGGCGAAGACCTGAGCCGCGCGGTGCTGCTGCAAATCATCGCCGACCGCGAACAGGACGGCGAGCCGATGCTCTCCACCCAGCTGCTGAGCCAGATCATCCGGTTCTATGGCGATTCGCTGCAGGGCTTCATGGGCAACTACCTGGAGCGCAGCATGCAGGTGTTCCTGGATCAGCAGCAGCAGTTCCGCCAGCAG…
>XooKACC 10331
TTGGCTGTTGCAAGCGCTGCTGCGGTGCGCCATCCTGCGCGCACTATCAGTGTGGGTGAACGTTCCATGGCCGGACTTCGCATCATCAAGAAGTATCCCAATCGCCGTCTCTACGACACGGAAATCTCCAGCTATATCACCATCGAAGATGTGCGCCAATTGATCATCGATGGCGAAGAATTCGAGGTACGCGATGCCAAGAGTGGCGAAGACCTGAGCCGCGCGGTGCTGCTGCAAATCATCGCCGACCGCGAACAGGACGGCGAGCCGATGCTCTCCACCCAGCTGCTGAGCCAGATCATCCGGTTCTATGGCGATTCGCTGCAGGGCTTCATGGGCAACTACCTGGAGCGCAGCATGCAGGTGTTCCTGGATCAGCAGCAGCAGTTCCGCCAGCAG…
>XooMAI145
TTGGCTGTTGCAAGCGCTGCTGCGGTGCGCCATCCTGCGCGCACTATCAGTGTGGGTGAACGTTCCATGGCCGGACTTCGCATCATCAAGAAGTACCCCAATCGCCGTCTCTACGACACGGAAATCTCCAGCTACATCACCATCGAAGACGTGCGCCAATTGATCATCGATGGCGAAGAATTCGAGGTACGCGACGCCAAGAGTGGCGAAGACCTGAGCCGCGCGGTGCTGCTGCAAATCATCGCCGACCGCGAACAGGACGGCGAGCCGATGCTCTCCACCCAGCTGCTGAGCCAGATCATCCGGTTCTATGGCGATTCGCTGCAGGGCTTCATGGGCAACTACCTGGAGCGCAGCATGCAGGTGTTCCTGGATCAGCAGCAGCAGTTCCGCCAGCAG…
>XooMAI134
TTGGCTGTTGCAAGCGCTGCTGCGGTGCGCCATCCTGCGCGCACTATCAGTGTGGGTGAACGTTCCATGGCCGGACTTCGCATCATCAAGAAGTACCCCAATCGCCGTCTCTACGACACGGAAATCTCCAGCTACATCACCATCGAAGACGTGCGCCAATTGATCATCGATGGCGAAGAATTCGAGGTACGCGACGCCAAGAGTGGCGAAGACCTGAGCCGCGCGGTGCTGCTGCAAATCATCGCCGACCGCGAACAGGACGGCGAGCCGATGCTCTCCACCCAGCTGCTGAGCCAGATCATCCGGTTCTATGGCGATTCGCTGCAGGGCTTCATGGGCAACTACCTGGAGCGCAGCATGCAGGTGTTCCTGGATCAGCAGCAGCAGTTCCGCCAGCAG…
>XooMAI129
TTGGCTGTTGCAAGCGCTGCTGCGGTGCGCCATCCTGCGCGCACTATCAGTGTGGGTGAACGTTCCATGGCCGGACTTCGCATCATCAAGAAGTACCCCAATCGCCGTCTCTACGACACGGAAATCTCCAGCTACATCACCATCGAAGACGTGCGCCAATTGATCATCGATGGCGAAGAATTCGAGGTACGCGACGCCAAGAGTGGCGAAGACCTGAGCCGCGCGGTGCTGCTGCAAATCATCGCCGACCGCGAACAGGACGGCGAGCCGATGCTCTCCACCCAGCTGCTGAGCCAGATCATCCGGTTCTATGGCGATTCGCTGCAGGGCTTCATGGGCAACTACCTGGAGCGCAGCATGCAGGTGTTCCTGGATCAGCAGCAGCAGTTCCGCCAGCAG…
>XooMAI106
TTGGCTGTTGCAAGCGCTGCTGCGGTGCGCCATCCTGCGCGCACTATCAGTGTGGGTGAACGTTCCATGGCCGGACTTCGCATCATCAAGAAGTACCCCAATCGCCGTCTCTACGACACGGAAATCTCCAGCTACATCACCATCGAAGACGTGCGCCAATTGATCATCGATGGCGAAGAATTCGAGGTACGCGACGCCAAGAGTGGCGAAGACCTGAGCCGCGCGGTGCTGCTGCAAATCATCGCCGACCGCGAACAGGACGGCGAGCCGATGCTCTCCACCCAGCTGCTGAGCCAGATCATCCGGTTCTATGGCGATTCGCTGCAGGGCTTCATGGGCAACTACCTGGAGCGCAGCATGCAGGTGTTCCTGGATCAGCAGCAGCAGTTCCGCCAGCAG…
>XooMAI99
TTGGCTGTTGCAAGCGCTGCTGCGGTGCGCCATCCTGCGCGCACTATCAGTGTGGGTGAACGTTCCATGGCCGGACTTCGCATCATCAAGAAGTACCCCAATCGCCGTCTCTACGACACGGAAATCTCCAGCTACATCACCATCGAAGACGTGCGCCAATTGATCATCGATGGCGAAGAATTCGAGGTACGCGACGCCAAGAGTGGCGAAGACCTGAGCCGCGCGGTGCTGCTGCAAATCATCGCCGACCGCGAACAGGACGGCGAGCCGATGCTCTCCACCCAGCTGCTGAGCCAGATCATCCGGTTCTATGGCGATTCGCTGCAGGGCTTCATGGGCAACTACCTGGAGCGCAGCATGCAGGTGTTCCTGGATCAGCAGCAGCAGTTCCGCCAGCAG…
>XooMAI95
TTGGCTGTTGCAAGCGCTGCTGCGGTGCGCCATCCTGCGCGCACTATCAGTGTGGGTGAACGTTCCATGGCCGGACTTCGCATCATCAAGAAGTACCCCAATCGCCGTCTCTACGACACGGAAATCTCCAGCTACATCACCATCGAAGACGTGCGCCAATTGATCATCGATGGCGAAGAATTCGAGGTACGCGACGCCAAGAGTGGCGAAGACCTGAGCCGCGCGGTGCTGCTGCAAATCATCGCCGACCGCGAACAGGACGGCGAGCCGATGCTCTCCACCCAGCTGCTGAGCCAGATCATCCGGTTCTATGGCGATTCGCTGCAGGGCTTCATGGGCAACTACCTGGAGCGCAGCATGCAGGTGTTCCTGGATCAGCAGCAGCAGTTCCGCCAGCAG…
>XooMAI73
TTGGCTGTTGCAAGCGCTGCTGCGGTGCGCCATCCTGCGCGCACTATCAGTGTGGGTGAACGTTCCATGGCCGGACTTCGCATCATCAAGAAGTACCCCAATCGCCGTCTCTACGACACGGAAATCTCCAGCTACATCACCATCGAAGACGTGCGCCAATTGATCATCGATGGCGAAGAATTCGAGGTACGCGACGCCAAGAGTGGCGAAGACCTGAGCCGCGCGGTGCTGCTGCAAATCATCGCCGACCGCGAACAGGACGGCGAGCCGATGCTCTCCACCCAGCTGCTGAGCCAGATCATCCGGTTCTATGGCGATTCGCTGCAGGGCTTCATGGGCAACTACCTGGAGCGCAGCATGCAGGTGTTCCTGGATCAGCAGCAGCAGTTCCGCCAGCAG…
>XooMAI68
TTGGCTGTTGCAAGCGCTGCTGCGGTGCGCCATCCTGCGCGCACTATCAGTGTGGGTGAACGTTCCATGGCCGGACTTCGCATCATCAAGAAGTACCCCAATCGCCGTCTCTACGACACGGAAATCTCCAGCTACATCACCATCGAAGACGTGCGCCAATTGATCATCGATGGCGAAGAATTCGAGGTACGCGACGCCAAGAGTGGCGAAGACCTGAGCCGCGCGGTGCTGCTGCAAATCATCGCCGACCGCGAACAGGACGGCGAGCCGATGCTCTCCACCCAGCTGCTGAGCCAGATCATCCGGTTCTATGGCGATTCGCTGCAGGGCTTCATGGGCAACTACCTGGAGCGCAGCATGCAGGTGTTCCTGGATCAGCAGCAGCAGTTCCGCCAGCAG…
>XooAXO1947
TTGGCTGTTGCAAGCGCTGCTGCGGTGCGCCATCCTGCGCGCACTATCAGTGTGGGTGAACGTTCCATGGCCGGACTTCGCATCATCAAGAAGTACCCCAATCGCCGTCTCTACGACACGGAAATCTCCAGCTACATCACCATCGAAGACGTGCGCCAATTGATCATCGATGGCGAAGAATTCGAGGTACGCGACGCCAAGAGTGGCGAAGACCTGAGCCGCGCGGTGCTGCTGCAAATCATCGCCGACCGCGAACAGGACGGCGAGCCGATGCTCTCCACCCAGCTGCTGAGCCAGATCATCCGGTTCTATGGCGATTCGCTGCAGGGCTTCATGGGCAACTACCTGGAGCGCAGCATGCAGGTGTTCCTGGATCAGCAGCAGCAGTTCCGCCAGCAG…
>XocCFBP2286
TTGGCTGTTGCAAGCGCTGCTGCGGTGCGCCATCCTGCGCGCACTATCAGTGTGGGTGAACGTTCCATGGCCGGACTTCGCATCATCAAGAAGTATCCCAATCGCCGTCTCTACGACACGGAAATCTCCAGCTACATCACCATCGAAGATGTGCGCCAATTGATCATCGATGGCGAAGAATTCGAGGTACGCGACGCCAAGAGTGGCGAAGACCTGAGCCGCGCGGTGCTGCTGCAAATCATCGCCGACCGCGAACAGGACGGCGAGCCGATGCTCTCCACCCAGCTGCTGAGCCAGATCATCCGGTTCTATGGCGATTCGCTGCAGGGCTTCATGGGTAACTACCTGGAGCGCAGCATGCAGGTGTTCCTGGATCAGCAGCAGCAGTTCCGCCAGCAG…
>XocRS105
TTGGCTGTTGCAAGCGCTGCTGCGGTGCGCCATCCTGCGCGCACTATCAGTGTGGGTGAACGTTCCATGGCCGGACTTCGCATCATCAAGAAGTATCCCAATCGCCGTCTCTACGACACGGAAATCTCCAGCTACATCACCATCGAAGATGTGCGCCAATTGATCATCGATGGCGAAGAATTCGAGGTACGCGACGCCAAGAGTGGCGAAGACCTGAGCCGCGCGGTGCTGCTGCAAATCATCGCCGACCGCGAACAGGACGGCGAGCCGATGCTCTCCACCCAGCTGCTGAGCCAGATCATCCGGTTCTATGGCGATTCGCTGCAGGGCTTCATGGGTAACTACCTGGAGCGCAGCATGCAGGTGTTCCTGGATCAGCAGCAGCAGTTCCGCCAGCAG…
>XocL8
TTGGCTGTTGCAAGCGCTGCTGCGGTGCGCCATCCTGCGCGCACTATCAGTGTGGGTGAACGTTCCATGGCCGGACTTCGCATCATCAAGAAGTATCCCAATCGCCGTCTCTACGACACGGAAATCTCCAGCTACATCACCATCGAAGATGTGCGCCAATTGATCATCGATGGCGAAGAATTCGAGGTACGCGACGCCAAGAGTGGCGAAGACCTGAGCCGCGCGGTGCTGCTGCAAATCATCGCCGACCGCGAACAGGACGGCGAGCCGATGCTCTCCACCCAGCTGCTGAGCCAGATCATCCGGTTCTATGGCGATTCGCTGCAGGGCTTCATGGGTAACTACCTGGAGCGCAGCATGCAGGTGTTCCTGGATCAGCAGCAGCAGTTCCGCCAGCAG…
>XocCFBP7341
TTGGCTGTTGCAAGCGCTGCTGCGGTGCGCCATCCTGCGCGCACTATCAGTGTGGGTGAACGTTCCATGGCCGGACTTCGCATCATCAAGAAGTATCCCAATCGCCGTCTCTACGACACGGAAATCTCCAGCTACATCACCATCGAAGATGTGCGCCAATTGATCATCGATGGCGAAGAATTCGAGGTACGCGACGCCAAGAGTGGCGAAGACCTGAGCCGCGCGGTGCTGCTGCAAATCATCGCCGACCGCGAACAGGACGGCGAGCCGATGCTCTCCACCCAGCTGCTGAGCCAGATCATCCGGTTCTATGGCGATTCGCTGCAGGGCTTCATGGGTAACTACCTGGAGCGCAGCATGCAGGTGTTCCTGGATCAGCAGCAGCAGTTCCGCCAGCAG…
>XocCFBP7331
TTGGCTGTTGCAAGCGCTGCTGCGGTGCGCCATCCTGCGCGCACTATCAGTGTGGGTGAACGTTCCATGGCCGGACTTCGCATCATCAAGAAGTATCCCAATCGCCGTCTCTACGACACGGAAATCTCCAGCTACATCACCATCGAAGATGTGCGCCAATTGATCATCGATGGCGAAGAATTCGAGGTACGCGACGCCAAGAGTGGCGAAGACCTGAGCCGCGCGGTGCTGCTGCAAATCATCGCCGACCGCGAACAGGACGGCGAGCCGATGCTCTCCACCCAGCTGCTGAGCCAGATCATCCGGTTCTATGGCGATTCGCTGCAGGGCTTCATGGGTAACTACCTGGAGCGCAGCATGCAGGTGTTCCTGGATCAGCAGCAGCAGTTCCGCCAGCAG…
>XocBXOR1
TTGGCTGTTGCAAGCGCTGCTGCGGTGCGCCATCCTGCGCGCACTATCAGTGTGGGTGAACGTTCCATGGCCGGACTTCGCATCATCAAGAAGTATCCCAATCGCCGTCTCTACGACACGGAAATCTCCAGCTACATCACCATCGAAGATGTGCGCCAATTGATCATCGATGGCGAAGAATTCGAGGTACGCGACGCCAAGAGTGGCGAAGACCTGAGCCGCGCGGTGCTGCTGCAAATCATCGCCGACCGCGAACAGGACGGCGAGCCGATGCTCTCCACCCAGCTGCTGAGCCAGATCATCCGGTTCTATGGCGATTCGCTGCAGGGCTTCATGGGTAACTACCTGGAGCGCAGCATGCAGGTGTTCCTGGATCAGCAGCAGCAGTTCCGCCAGCAG…
>XocBLS279
TTGGCTGTTGCAAGCGCTGCTGCGGTGCGCCATCCTGCGCGCACTATCAGTGTGGGTGAACGTTCCATGGCCGGACTTCGCATCATCAAGAAGTATCCCAATCGCCGTCTCTACGACACGGAAATCTCCAGCTACATCACCATCGAAGATGTGCGCCAATTGATCATCGATGGCGAAGAATTCGAGGTACGCGACGCCAAGAGTGGCGAAGACCTGAGCCGCGCGGTGCTGCTGCAAATCATCGCCGACCGCGAACAGGACGGCGAGCCGATGCTCTCCACCCAGCTGCTGAGCCAGATCATCCGGTTCTATGGCGATTCGCTGCAGGGCTTCATGGGTAACTACCTGGAGCGCAGCATGCAGGTGTTCCTGGATCAGCAGCAGCAGTTCCGCCAGCAG…
>XocB8-12
TTGGCTGTTGCAAGCGCTGCTGCGGTGCGCCATCCTGCGCGCACTATCAGTGTGGGTGAACGTTCCATGGCCGGACTTCGCATCATCAAGAAGTATCCCAATCGCCGTCTCTACGACACGGAAATCTCCAGCTACATCACCATCGAAGATGTGCGCCAATTGATCATCGATGGCGAAGAATTCGAGGTACGCGACGCCAAGAGTGGCGAAGACCTGAGCCGCGCGGTGCTGCTGCAAATCATCGCCGACCGCGAACAGGACGGCGAGCCGATGCTCTCCACCCAGCTGCTGAGCCAGATCATCCGGTTCTATGGCGATTCGCTGCAGGGCTTCATGGGTAACTACCTGGAGCGCAGCATGCAGGTGTTCCTGGATCAGCAGCAGCAGTTCCGCCAGCAG…
>XocBLS256
TTGGCTGTTGCAAGCGCTGCTGCGGTGCGCCATCCTGCGCGCACTATCAGTGTGGGTGAACGTTCCATGGCCGGACTTCGCATCATCAAGAAGTATCCCAATCGCCGTCTCTACGACACGGAAATCTCCAGCTACATCACCATCGAAGATGTGCGCCAATTGATCATCGATGGCGAAGAATTCGAGGTACGCGACGCCAAGAGTGGCGAAGACCTGAGCCGCGCGGTGCTGCTGCAAATCATCGCCGACCGCGAACAGGACGGCGAGCCGATGCTCTCCACCCAGCTGCTGAGCCAGATCATCCGGTTCTATGGCGATTCGCTGCAGGGCTTCATGGGTAACTACCTGGAGCGCAGCATGCAGGTGTTCCTGGATCAGCAGCAGCAGTTCCGCCAGCAG…
>XocYM15
TTGGCTGTTGCAAGCGCTGCTGCGGTGCGCCATCCTGCGCGCACTATCAGTGTGGGTGAACGTTCCATGGCCGGACTTCGCATCATCAAGAAGTATCCCAATCGCCGTCTCTACGACACGGAAATCTCCAGCTACATCACCATCGAAGATGTGCGCCAATTGATCATCGATGGCGAAGAATTCGAGGTACGCGACGCCAAGAGTGGCGAAGACCTGAGCCGCGCGGTGCTGCTGCAAATCATCGCCGACCGCGAACAGGACGGCGAGCCGATGCTCTCCACCCAGCTGCTGAGCCAGATCATCCGGTTCTATGGCGATTCGCTGCAGGGCTTCATGGGTAACTACCTGGAGCGCAGCATGCAGGTGTTCCTGGATCAGCAGCAGCAGTTCCGCCAGCAG…
>XocCFBP7342
TTGGCTGTTGCAAGCGCTGCTGCGGTGCGCCATCCTGCGCGCACTATCAGTGTGGGTGAACGTTCCATGGCCGGACTTCGCATCATCAAGAAGTATCCCAATCGCCGTCTCTACGACACGGAAATCTCCAGCTACATCACCATCGAAGATGTGCGCCAATTGATCATCGATGGCGAAGAATTCGAGGTACGCGACGCCAAGAGTGGCGAAGACCTGAGCCGCGCGGTGCTGCTGCAAATCATCGCCGACCGCGAACAGGACGGCGAGCCGATGCTCTCCACCCAGCTGCTGAGCCAGATCATCCGGTTCTATGGCGATTCGCTGCAGGGCTTCATGGGTAACTACCTGGAGCGCAGCATGCAGGTGTTCCTGGATCAGCAGCAGCAGTTCCGCCAGCAG…
>XppCFBP6982
TTGGCTGTTGCAAGCGCTGCTGCGGTGCGCCATCCTGCGCGCACTATCAGTGTGGGTGAACGTTCCATGGCCGGACTTCGCATCATCAAGAAGTATCCCAATCGCCGTCTCTACGACACGGAAATCTCCAGCTACATCACCATCGAAGATGTGCGCCAATTGATCATCGATGGCGAAGAATTCGAAGTACGCGACGCCAAGAGTGGCGAAGACCTCAGCCGTGCAGTGCTGCTGCAGATCATCGCCGACCGCGAACAGGACGGCGAGCCGATGCTCTCCACCCAGTTGCTGAGCCAGATCATCCGGTTTTATGGCGACTCGCTGCAGGGCTTCATGGGCAACTACCTGGAGCGCAGCATGCAGGTGTTCCTGGACCAGCAGCAGCAGTTCCGTCAACAG…
>Xp91-118
TTGGCTGTTGCAAGCGCTGCTGCGGTGCGCCATCCTGCGCGCACTATCAGTGTGGGTGAACGTTCCATGGCCGGACTTCGCATCATCAAGAAGTATCCCAATCGCCGTCTCTACGACACGGAAATCTCCAGCTACATCACCATCGAAGATGTGCGCCAATTGATCATCGATGGCGAAGAATTCGAAGTACGCGATGCCAAGAGCGGCGAGGACCTCAGCCGCGCAGTGCTGCTGCAAATCATCGCCGACCGCGAGCAGGACGGCGAGCCGATGCTCTCCACCCAGTTGCTGAGCCAGATCATCCGGTTTTATGGCGACTCGCTGCAGGGCTTCATGGGCAATTACCTGGAGCGCAGCATGCAGGTGTTCCTGGATCAGCAGCAGCAGTTCCGTCAGCAG…
>XadLMG695
TTGGCTGTTGCAAGCGCTGCTGCGGTGCGCCATCCTGCGCGCACTATCAGTGTGGGTGAACGTTCCATGGCCGGACTTCGCATCATCAAGAAGTATCCCAATCGCCGTCTCTACGACACGGAAATCTCCAGCTACATCACCATCGAAGATGTGCGCCAATTGATCATCGATGGCGAAGAATTCGAAGTACGCGACGCCAAAAGTGGCGAAGACCTCAGCCGTGCAGTGCTGCTGCAGATCATCGCCGACCGCGAGCAGGACGGCGAGCCGATGCTCTCCACCCAGTTGCTGAGCCAGATCATCCGGTTTTATGGCGACTCGCTGCAGGGCTTCATGGGCAACTACCTGGAGCGCAGCATGCAGGTGTTCCTCGACCAGCAGCAGCAGTTCCGTCAACAG…
>XeLMG930
TTGGCTGTTGCAAGCGCTGCTGCGGTGCGCCATCCTGCGCGCACTATCAGTGTGGGTGAACGTTCCATGGCCGGACTTCGCATCATCAAGAAGTATCCCAATCGCCGTCTCTACGACACGGAAATCTCCAGCTACATCACCATCGAAGATGTGCGCCAATTGATCATCGATGGCGAAGAATTCGAAGTACGCGATGCCAAGAGCGGCGAGGACCTCAGCCGCGCAGTGCTGCTGCAAATCATCGCCGACCGCGAGCAGGACGGCGAGCCGATGCTCTCCACCCAGTTGCTGAGCCAGATCATCCGGTTTTATGGCGACTCGCTGCAGGGCTTCATGGGCAATTACCTGGAGCGCAGCATGCAGGTGTTCCTGGATCAGCAGCAGCAGTTCCGTCAGCAG…
> Xcv85-10
TTGGCTGTTGCAAGCGCTGCTGCGGTGCGCCATCCTGCGCGCACTATCAGTGTGGGTGAACGTTCCATGGCCGGACTTCGCATCATCAAGAAGTATCCCAATCGCCGTCTCTACGACACGGAAATCTCCAGCTACATCACCATCGAAGATGTGCGCCAATTGATCATCGATGGCGAAGAATTCGAAGTACGCGATGCCAAGAGCGGCGAGGACCTCAGCCGCGCAGTGCTGCTGCAAATCATCGCCGACCGCGAGCAGGACGGCGAGCCGATGCTCTCCACCCAGTTGCTGAGCCAGATCATCCGGTTTTATGGCGACTCGCTGCAGGGCTTCATGGGCAATTACCTGGAGCGCAGCATGCAGGTGTTCCTGGATCAGCAGCAGCAGTTCCGTCAGCAG…
>XacF1
TTGGCTGTTGCAAGCGCTGCTGCGGTGCGCCATCCTGCGCGCACTATCAGTGTGGGTGAACGTTCCATGGCCGGACTTCGCATCATCAAGAAGTATCCCAATCGCCGTCTCTACGACACGGAAATCTCCAGCTACATCACCATCGAAGATGTGCGCCAATTGATCATCGATGGCGAAGAATTCGAAGTACGCGATGCCAAGAGCGGCGAGGACCTCAGCCGCGCAGTACTGCTGCAGATCATCGCCGACCGCGAGCAGGACGGCGAGCCGATGCTCTCCACCCAGTTGCTGAGCCAGATCATCCGGTTTTATGGCGACTCGCTGCAGGGCTTCATGGGCAATTACCTGGAGCGCAGCATGCAGGTGTTCCTGGATCAGCAGCAGCAGTTCCGTCAGCAG…
>XcviCFBP7111
TTGGCTGTTGCAAGCGCTGCTGCGGTGCGCCATCCTGCGCGCACTATCAGTGTGGGTGAACGTTCCATGGCCGGACTTCGCATCATCAAGAAGTATCCCAATCGCCGTCTCTACGACACGGAAATCTCCAGCTATATCACCATCGAAGATGTGCGCCAGTTGATCATCGATGGCGAAGAATTCGAAGTACGCGACGCCAAGAGCGGCGAGGACCTCAGCCGCGCAGTCCTGCTGCAAATCATCGCCGACCGCGAGCAGGACGGCGAGCCGATGCTCTCCACCCAGTTGCTGAGCCAGATCATCCGGTTTTACGGCGACTCGCTGCAGGGCTTCATGGGCAATTACCTGGAGCGCAGCATGCAGGTGTTCCTGGATCAGCAGCAGCAGTTCCGCCAGCAG…
>XppCFBP6988
TTGGCTGTTGCAAGCGCTGCTGCGGTGCGCCATCCTGCGCGCACTATCAGTGTGGGTGAACGTTCCATGGCCGGACTTCGCATCATCAAGAAGTATCCCAATCGCCGTCTCTACGACACGGAAATCTCCAGCTACATCACCATCGAAGATGTGCGCCAGTTGATCATCGATGGCGAAGAATTCGAAGTACGCGACGCCAAGAGCGGCGAGGACCTCAGCCGCGCAGTCCTGCTGCAAATCATCGCCGACCGCGAGCAGGACGGCGAGCCGATGCTCTCCACCCAGTTGCTGAGCCAGATCATCCGGTTTTACGGCGACTCGCTGCAGGGCTTCATGGGCAATTACCTGGAGCGCAGCATGCAGGTGTTCCTGGATCAGCAGCAGCAGTTCCGCCAGCAG…
>Xcf4834-R
TTGGCTGTTGCAAGCGCTGCTGCGGTGCGCCATCCTGCGCGCACTATCAGTGTGGGTGAACGTTCCATGGCCGGACTTCGCATCATCAAGAAGTATCCCAATCGCCGTCTCTACGACACGGAAATCTCCAGCTACATCACCATCGAAGATGTGCGCCAGTTGATCATCGATGGCGAAGAATTCGAAGTACGCGACGCCAAGAGCGGCGAGGACCTCAGCCGCGCAGTCCTGCTGCAAATCATCGCCGACCGCGAGCAGGACGGCGAGCCGATGCTCTCCACCCAGTTGCTGAGCCAGATCATCCGGTTTTACGGCGACTCGCTGCAGGGCTTCATGGGCAATTACCTGGAGCGCAGCATGCAGGTGTTCCTGGATCAGCAGCAGCAGTTCCGCCAGCAG…
>Xca1566
TTGGCTGTTGCAAGCGCTGCTGCGGTGCGCCATCCTGCGCGCACTATCAGTGTGGGTGAACGTTCCATGGCCGGACTTCGCATCATCAAGAAGTATCCCAATCGCCGTCTCTACGACACGGAAATCTCCAGCTACATCACCATCGAAGATGTGCGCCAGTTGATCATCGATGGCGAAGAATTCGAAGTACGCGACGCCAAGAGCGGCGAGGACCTCAGCCGCGCAGTCCTACTGCAAATCATCGCCGACCGCGAGCAGGACGGCGAGCCGATGCTCTCCACCCAGTTGCTGAGCCAGATCATCCGGTTTTACGGCGACTCGCTGCAGGGCTTCATGGGCAATTACCTGGAGCGCAGCATGCAGGTGTTCCTGGATCAGCAGCAGCAGTTCCGCCAGCAG…
